# Supplementary material for: Water transport facilitated by carbon nanotubes enables a hygroresponsive actuator with negative hydrotaxis
Source: Royal Society of Chemistry journal article supplement (doi:10.1039/d0nr00932f), 2020-01-01
Supplement: d0nr00932f9.pdf [file d0nr00932f9.pdf]

**Supporting Information:**

**The water transport facilitated by carbon nanotubes enables a hygroresponsive actuator with a negative hydrotaxis**

*Hui Chen,<sup>†a</sup> Yuanhang Ge,<sup>†a</sup> Sunjie Ye,<sup>d</sup> Zhifeng Zhu,<sup>a</sup> Yingfeng Tu,<sup>a</sup> Denteng Ge,<sup>e</sup> Zhao Xu,<sup>e</sup> Wei Chen<sup>\*c</sup> and Xiaoming Yang<sup>\*ab</sup>*

<sup>a</sup> State and Local Joint Engineering Laboratory for Novel Functional Polymeric Materials, Suzhou Key Laboratory of Macromolecular Design and Precision Synthesis, Jiangsu Key Laboratory of Advanced Functional Polymer Design and Application, Department of Polymer Science and Engineering, College of Chemistry, Chemical Engineering and Materials Science, Soochow University, Suzhou 215123, P. R. China. E-mail: yangxiaoming@suda.edu.cn.

<sup>b</sup> State Key Laboratory of Pollution Control and Resource Reuse, School of the Environment, Nanjing University, Nanjing 210023, PR China.

<sup>c</sup> Research Centre for Smart Wearable Technology, Institute of Textiles and Clothing, The Hong Kong Polytechnic University, Hong Kong 999077, P. R. China. E-mail: weii.chen@polyu.edu.hk

<sup>d</sup> School of Physics and Astronomy, University of Leeds, LS2 9JT, Leeds, UK.

<sup>e</sup> State Key Laboratory of Advanced Textile Materials and Manufacturing Technology (Zhejiang Sci-Tech University), Ministry of Education. State Key Laboratory for Modification of Chemical Fibers and Polymer Materials Institute of Functional Materials, Donghua University, Shanghai 201620, P. R. China.

Movie S1: The response of CS/MWCNTs film to moisture from the right.

Movie S2: The response of CS/MWCNTs film to dry N<sub>2</sub> from the right.

Movie S3: The response of CS/MWCNTs film on a moist substrate at 40 °C.

Movie S4: The oscillating film.

Movie S5: A hanged strip of CS/MWCNTs functioning as a cantilever crane.

Movie S6: Composite film grabbing object dropping object.

Movie S7: Motion of the device triggered by humidity stimulus.

Movie S8: A bi-responsive sensor which was assembled by a film, copper wire and two LED lights of different colors

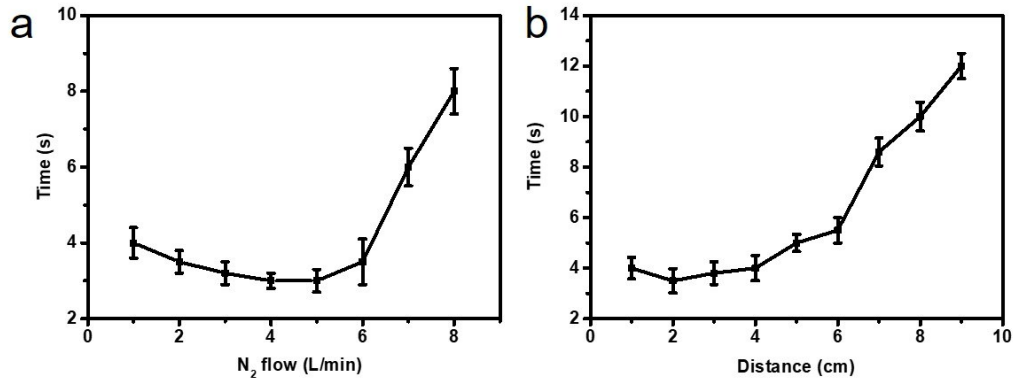

**Fig. S1** Reversible transition properties of the actuator upon the gradient absorption/desorption of moisture at different nitrogen flow (a) and distance between the sample and the stimulus (b).

According to the equation below, the larger strain energy ( $u$ ) during the bending deformation leads to larger kinetic energy after the removal of external force (e.g. the external response), and consequently induces faster recovery.

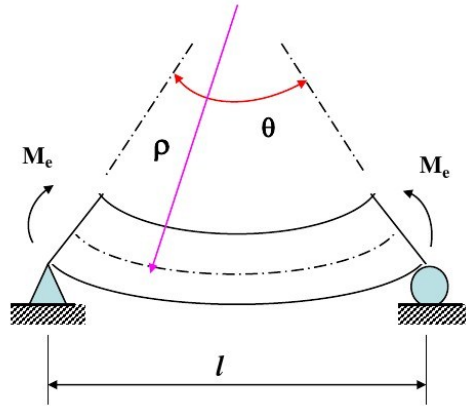

$$u = w = \frac{1}{2}M\theta = \frac{1\theta EI}{2 l} \theta = \frac{\theta^2 EI}{2l}$$

where,  $\rho$  is radius,  $\theta$  is bending angle,  $l$  is the length of the sample,  $u$  is strain energy,  $w$  is work,  $I$  is moment of inertia of an area,  $M$  is bending moment,  $M_e$  is external moment,  $E$  is modulus.

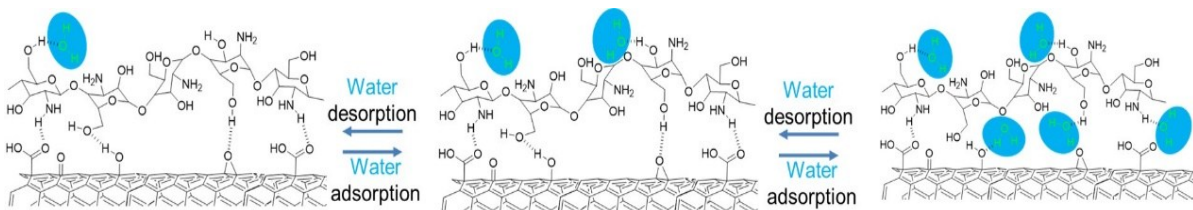

**Fig. S2** Schematic structure of the composite film and mechanism of water exchange with environment. The structure changes (involving H bonds) in response to the adsorption and desorption of water (blue dots).

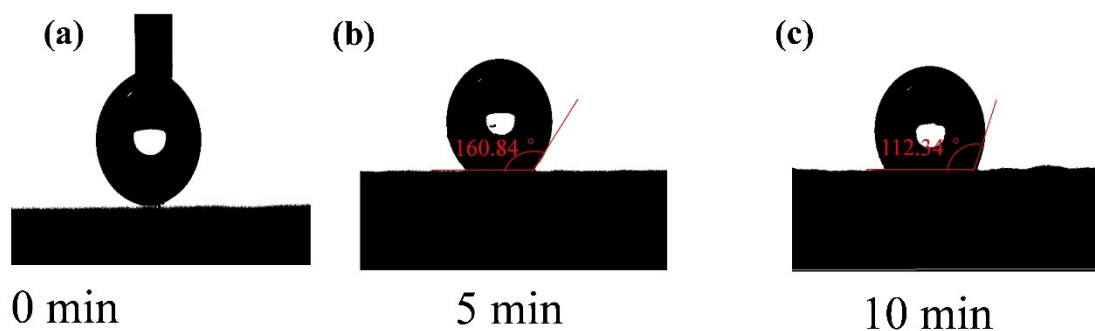

**Fig. S3** Test of contact angles on MWCNTs upon varying durations of acid treatment.

The contact angle goniometer from Kruss was used to characterize the MWCNTs surface polarity. The contact angle measurements on the MWCNTs surface were carried out using a droplet of 5  $\mu$ L at room temperature. As the final data, the mean of three values of contact angles on different areas of the membranes was used.

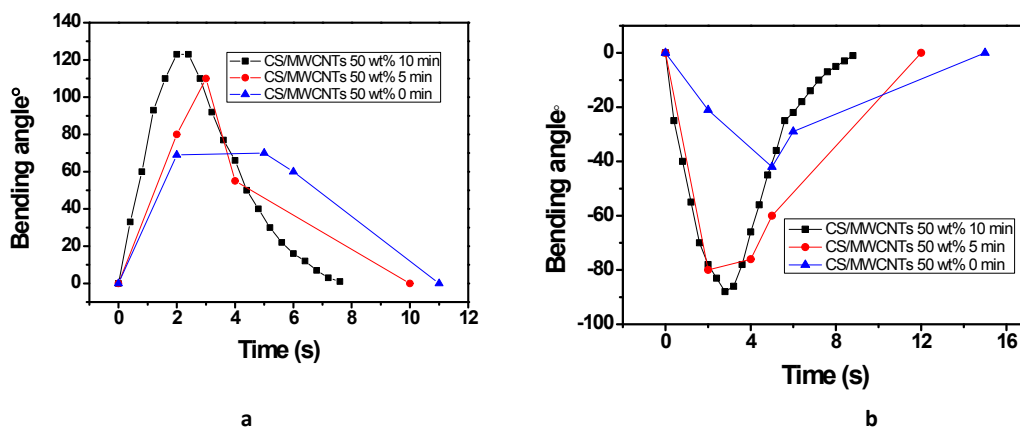

**Fig. S4** Time-dependent angles of bending and unbending deformation of CS/MWCNTs 50 wt% composite film containing MWCNTs upon varying durations of acid treatment. (a) wet stimulus (RH=100%) and (b) dry stimulus (RH=0).

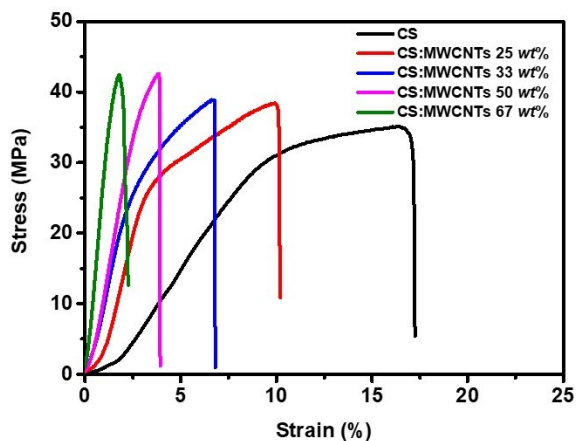

**Fig. S5** Stress-strain curves of neat chitosan and its MWCNTs composite film with different MWCNTs content at a crosshead speed of 5 mm/min.

**Tab. S1** Tensile modulus ( $E$ ) and yield strength ( $\sigma_y$ ) of chitosan/MWCNTs composites as a function of MWCNTs content.

| Sample             | Young's Modulus<br>( $E$ , GPa) | Tensile Strength<br>( $\sigma$ , MPa) | Elongation at Break<br>( $\epsilon$ , %) |
|--------------------|---------------------------------|---------------------------------------|------------------------------------------|
| Pure CS            | 0.410                           | 35.1                                  | 17.2                                     |
| CS/MWCNTs (25 wt%) | 1.05                            | 38.4                                  | 10.2                                     |
| CS/MWCNTs (33 wt%) | 1.20                            | 38.9                                  | 6.81                                     |
| CS/MWCNTs (50 wt%) | 1.57                            | 42.6                                  | 3.93                                     |
| CS/MWCNTs (67 wt%) | 2.88                            | 42.5                                  | 2.27                                     |

The typical stress-strain curves of chitosan and its MWCNTs composites at 50% RH are shown in Fig. 1. The summarized

tensile properties are listed in Tab. S1. It can be seen that, the addition of MWCNTs significantly improves the tensile properties of chitosan matrix, and the mechanical properties increase with the increase of MWCNTs loading. With the 50% content of MWCNTs, the tensile modulus and strength of the composite increase dramatically by about 293% and 21%, respectively, compared with those of its neat counterpart. Due to the aggregation of MWCNTs within the matrix at higher concentrations, with further increase of the loading level of MWCNTs (67%), the tensile modulus increases slightly, while the tensile strength keeps stable. CS possesses three kinds of functional groups, amino groups, primary and secondary hydroxyl groups, in a glucosamine unit. The functionalized MWCNTs contain carboxylic and hydroxyl groups. Strong hydrogen bonds may be formed between CS and the MWCNTs.<sup>43</sup> The compatibility and strong interactions between MWCNTs fillers and the matrix greatly enhance the dispersion as well as the interfacial adhesion, thus significantly increasing the mechanical properties of the matrix.

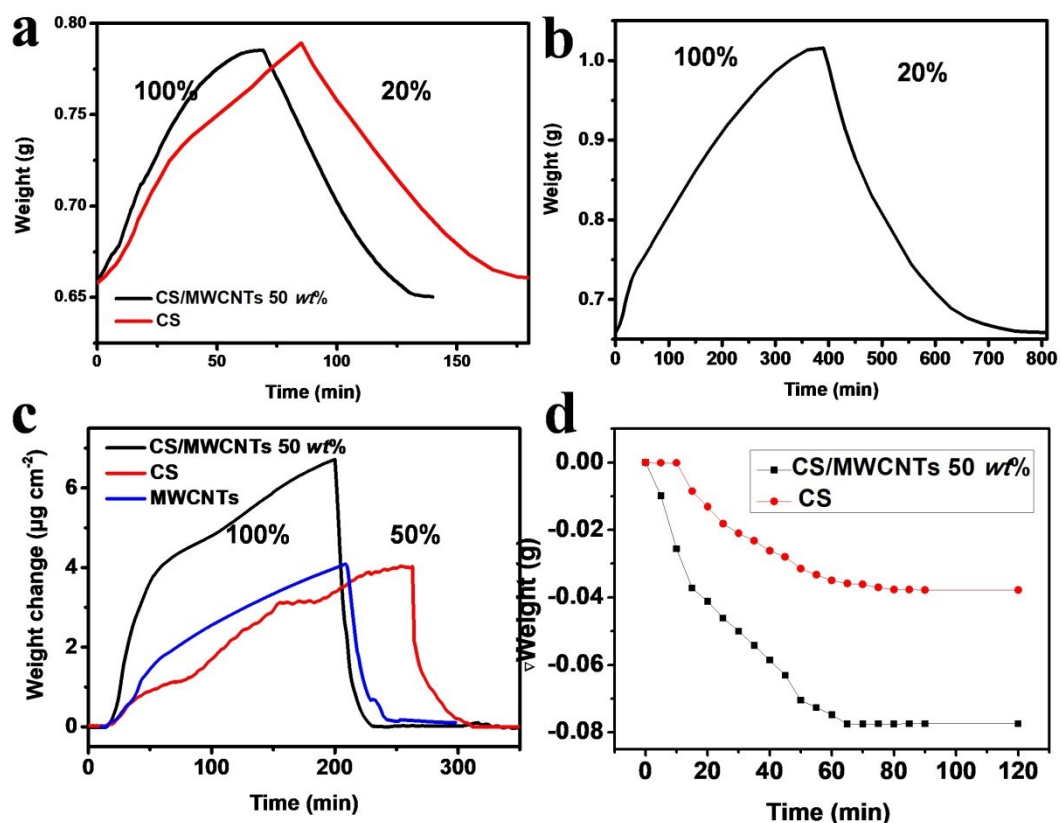

**Fig. S6** (a) Time-dependent weight change of CS/MWCNTs 50 wt% (black) and CS (red) by weighing method upon increasing the humidity and then decreasing the humidity. (b) Time-dependent weight change of CS by weighing method upon increasing the humidity and then decreasing the humidity at longer time. (c) Weight change (monitored by QCM) as a function of time, upon the change of humidity from 50% to 100%: CS (red), CS/MWCNTs 50wt% (black), and MWCNTs (blue). (d) Time-dependent weight change of CS (red) and CS/MWCNTs 50wt% (black) by weighing method upon decreasing the relative humidity from 50% to 0.

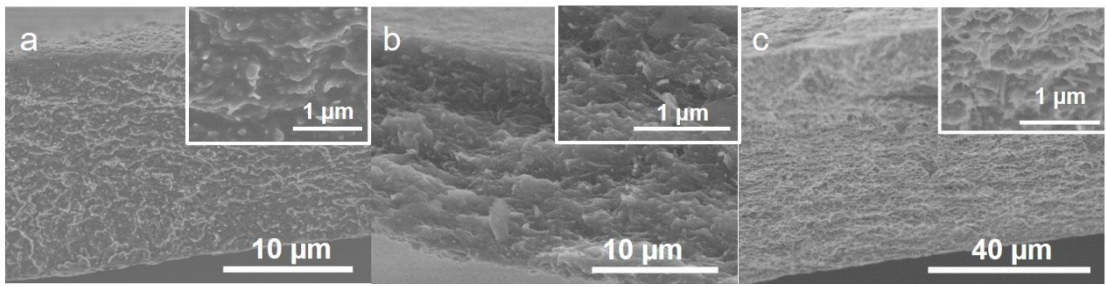

**Fig. S7** Cross-section SEM image of the film with three weight contents of MWCNTs: (a) 0 wt%, (b) 33 wt%, and (c) 67 wt%.
